# Supplementary material for: Ablation of the Sam68 RNA Binding Protein Protects Mice from Age-Related Bone Loss
Source: PLOS journal article supplement (doi:10.1371/journal.pgen.0010074), 2005-12-13
Supplement: S3 (10.1371/journal.pgen.0010074.s003) [file journal.pgen.0010074.s003]

**Dataset S3. Serum biochemistry and bone biomarkers in 4 and 12 month old mice**

| **Parameter** | **Units** | **Sam68+/+** | **Sam68+/+** | **Sam68-/-** | **mo Sam68-/-** |
| --- | --- | --- | --- | --- | --- |
| **Age (number)** |  | **4 mo (7)** | **12 mo (7)** | **4 mo (7)** | **12 mo (5)** |
| **sCTX** | **pmol/L** | 14.30 ± 2.58 | 19.10 ± 5.46 | 18.31 ± 2.51 | 13.21 ± 3.09b, d |
| **Leptin** | **ng/ ml** | 2.40 + 0.84 | 4.83 + 2.22 a | 3.08 + 1.45 | 2.13 + 0.49 a |
| **17 estradiol** | **pg/ml** | 14.49 ± 2.89 | 11.51 ± 2.03 | 17.13 ± 3.44 | 11.56 ± 1.49 a |
| **IL-6** | **pg/ml** | 6.43 ± 2.93 | 13.32 ± 8.42 | 4.73 ± 4.11 | 13.46 ± 5.24 b |
| **ALP** | **U/L** | 50.80 ± 26.96 | 70.20 ± 15.90 | 81.40 ± 5.86 | 61.00 ± 23.66 |
| **Ca** | **mmol/L** | 2.37 ± 0.12 | 2.39 ± 0.03 | 2.52 ± 0.14 | 2.51 ± 0.12 |
| **PO4** | **mmol/L** | 2.41 ± 0.58 | 2.12 ± 0.40 | 2.41 ± 0.60 | 1.98 ± 0.35 |
| **Mg** | **mmol/L** | 1.16 ± 0.22 | 1.34 ± 0.29 | 1.21 ± 0.22 | 1.17 ± 0.12 |

sCTX: c-terminal telopeptide; 17 estradiol: estrogen; IL-6: interleukin 6; ALP: alkaline phosphatase; Ca: calcium; PO4: inorganicphosphate; Mg: magnesium.

*P* a < 0.01 and b <0.05 compared with 4 month mice of same genotype

*P* c < 0.01 and d <0.05 compared with wild type mice of the same age
